CORRECTION

# Correction: Using stochastic language models (SLM) to map lexical, syntactic, and phonological information processing in the brain

The *PLOS ONE* Staff

## Notice of republication

This article was republished on February 21, 2019 to correct for errors in the Data Availability statement introduced during the typesetting process. The publisher apologizes for the errors. Please download this article again to view the correct version.

## Reference

1. Lopopolo A, Frank SL, van den Bosch A, Willems RM (2017) Using stochastic language models (SLM) to map lexical, syntactic, and phonological information processing in the brain. *PLoS ONE* 12(5): e0177794. <https://doi.org/10.1371/journal.pone.0177794> PMID: 28542396

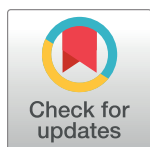

## OPEN ACCESS

**Citation:** The *PLOS ONE* Staff (2019) Correction: Using stochastic language models (SLM) to map lexical, syntactic, and phonological information processing in the brain. *PLoS ONE* 14(2): e0213450. <https://doi.org/10.1371/journal.pone.0213450>

**Published:** February 28, 2019

**Copyright:** © 2019 The PLOS ONE Staff. This is an open access article distributed under the terms of the [Creative Commons Attribution License](https://creativecommons.org/licenses/by/4.0/), which permits unrestricted use, distribution, and reproduction in any medium, provided the original author and source are credited.
